# Supplementary material for: Heterologous Expression, Purification, and Immunomodulatory Effects of Recombinant Lipoprotein GUDIV-103 Isolated from Ureaplasma diversum
Source: MDPI journal article supplement (doi:10.3390/microorganisms10051032), 2022-05-16
Supplement: s1 [file s1]

## Supplementary Materials

**Table S1:** *Ureaplasma diversum* isolates from different farms and Brazilian states

| Isolate     | Location |           | Isolate              | Location |         |
|-------------|----------|-----------|----------------------|----------|---------|
|             | Farm     | State *   |                      | Farm     | State * |
| <b>BA78</b> | 10       | BA        | <b>805</b>           | 3        | MS      |
| <b>34</b>   | 10       | BA        | <b>9653</b>          | 3        | MS      |
| <b>35</b>   | 10       | BA        | <b>A203</b>          | 1        | SP      |
| <b>37</b>   | 10       | BA        | <b>GOTA</b>          | 2        | SP      |
| <b>47</b>   | 11       | BA        | <b>S6</b>            | 9        | SP      |
| <b>51</b>   | 11       | BA        | <b>S8</b>            | 9        | SP      |
| <b>52</b>   | 11       | BA        | <b>5T</b>            | 8        | SP      |
| <b>54</b>   | 11       | BA        | <b>7T</b>            | 8        | SP      |
| <b>55</b>   | 11       | BA        | <b>10T</b>           | 8        | SP      |
| <b>56</b>   | 11       | BA        | <b>13T</b>           | 8        | SP      |
| <b>78</b>   | 10       | BA        | <b>16T</b>           | 8        | SP      |
| <b>83</b>   | 10       | BA        | <b>72</b>            | 4        | SP      |
| <b>84,2</b> | 10       | BA        | <b>73</b>            | 4        | SP      |
| <b>89</b>   | 10       | BA        | <b>84</b>            | 4        | SP      |
| <b>111</b>  | 13       | BA        | <b>93</b>            | 2        | SP      |
| <b>133</b>  | 13       | BA        | <b>94</b>            | 2        | SP      |
| <b>148</b>  | 13       | BA        | <b>95</b>            | 2        | SP      |
| <b>174</b>  | 13       | BA        | <b>98</b>            | 2        | SP      |
| <b>198</b>  | 13       | BA        | <b>100</b>           | 2        | SP      |
| <b>234</b>  | 12       | BA        | <b>102</b>           | 2        | SP      |
| <b>239</b>  | 12       | BA        | <b>59</b>            | 1        | SP      |
| <b>249</b>  | 12       | BA        | <b>A523**</b>        | –        | –       |
| <b>Ud18</b> | <b>6</b> | <b>MG</b> | <b>ATCC 49782***</b> | –        | –       |

\* BA: Bahia, MG: Minas Gerais, MS: Mato Grosso do Sul, SP: São Paulo. \*\*No defined location. \*\*\* Reference strain isolated from a cow with granular vulvovaginitis in Ontario, Canada [39].

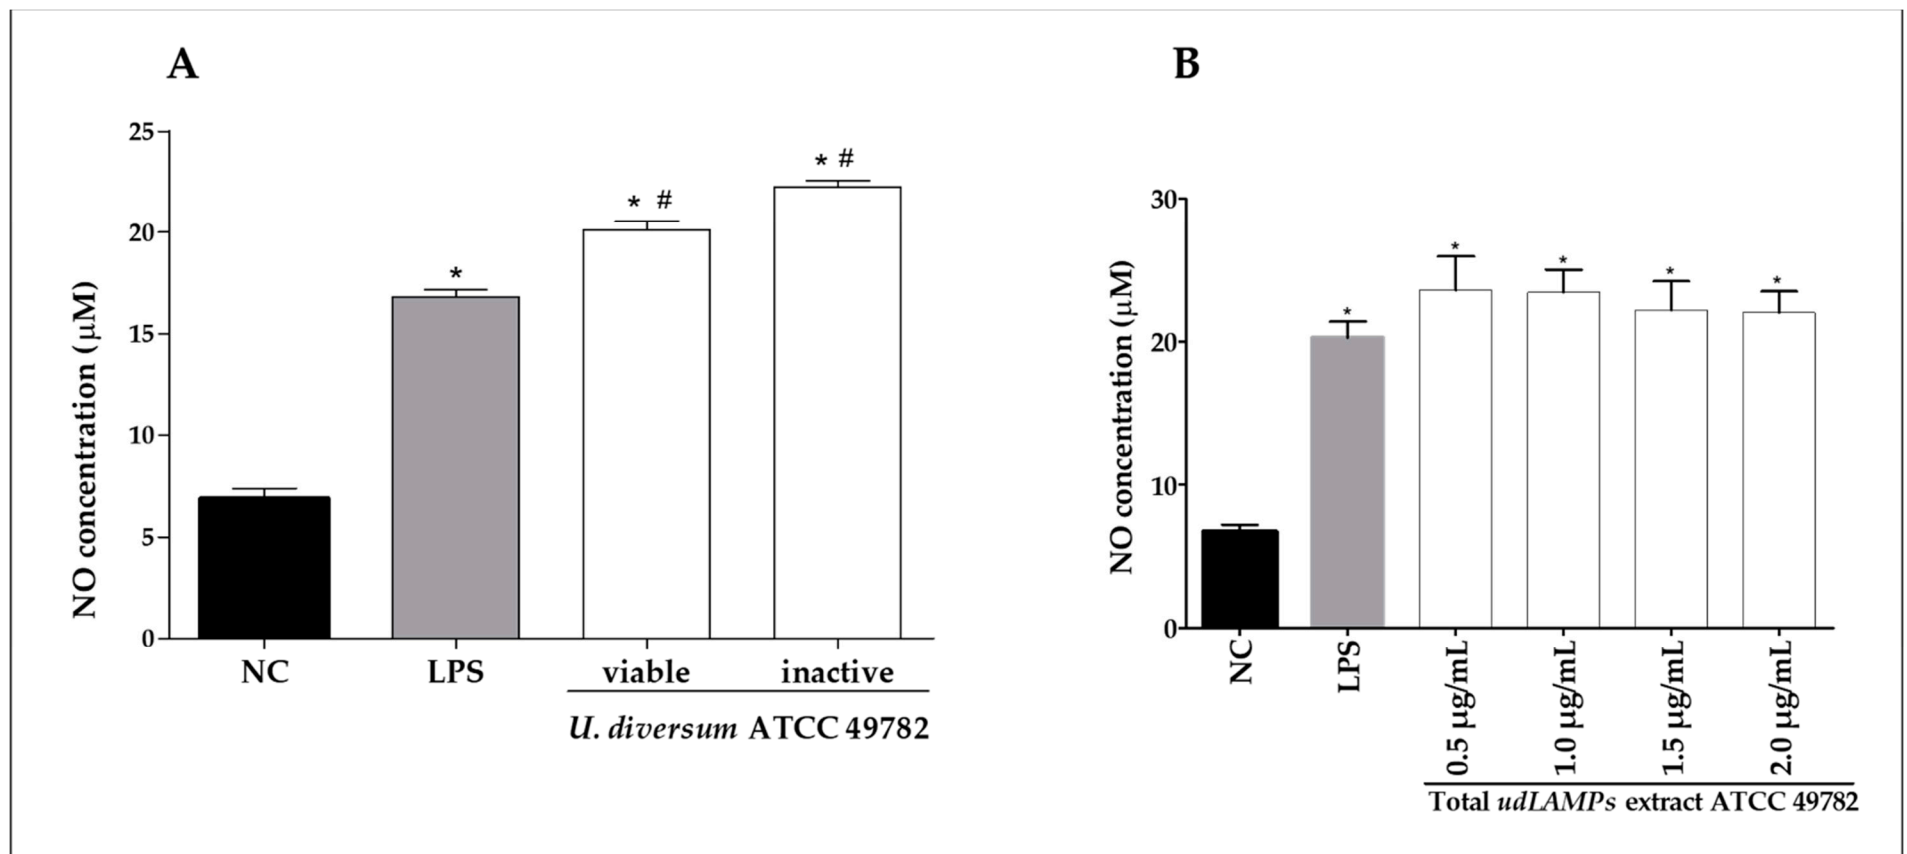

**Figure S1.** NO concentration induced in bovine peripheral blood mononuclear cell (PBMC) culture supernatant after incubation with viable and inactive *U. diversum* ATCC 49782 (A) and after incubation with 0.5, 1.0, 1.5 and 2.0  $\mu\text{g/mL}$  of total lipoproteins extracted (B). Treatments were compared using the Kruskal–Wallis non-parametric test followed by Dunn’s post-hoc test. Different symbols indicate statistically different groups. \*  $p < 0.05$  vs negative group. #  $p < 0.05$  vs. LPS group. Data are expressed as the mean  $\pm$  standard deviation ( $n = 9$ ).
